# Supplementary material
Source: PubMed Central journal article supplement (PMC4558941)
Supplement: NIHMS64221-supplement-01.pdf [file NIHMS64221-supplement-01.pdf]

Figure E1.

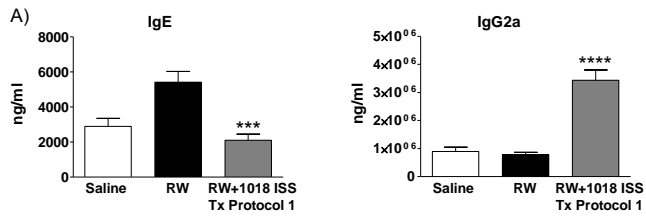

**Table E1: Selected Th2-associated genes upregulated in ragweed (RW) allergic mice**

| Genes                                                   |                | With Final Challenge |          | Without Final Challenge |         |
|---------------------------------------------------------|----------------|----------------------|----------|-------------------------|---------|
|                                                         |                | RW versus Saline     |          | RW versus Saline        |         |
| Common Name                                             | <i>mSymbol</i> | Fold Induction       | p-value  | Fold Induction          | p-value |
| Anterior gradient 2 ( <i>Xenopus laevis</i> )           | <i>Agr2</i>    | 17.8                 | 0.0017   | 1.6                     | 0.4602  |
| Arginase, liver                                         | <i>Arg1</i>    | 102.6                | < 0.0001 | 1.6                     | 0.2370  |
| Branched chain aminotransferase 1, cytosolic            | <i>Bcat1</i>   | 13.0                 | 0.0016   | 3.5                     | 0.0233  |
| Chemokine (C-C motif) ligand 7                          | <i>Ccl7</i>    | 31.7                 | 0.0001   | 1.3                     | 0.2655  |
| Chemokine (C-C motif) ligand 8                          | <i>Ccl8</i>    | 22.5                 | < 0.0001 | 3.5                     | 0.0024  |
| Chemokine (C-C motif) ligand 9                          | <i>Ccl9</i>    | 4.5                  | 0.0009   | 1.1                     | 0.7067  |
| Chemokine (C-C motif) ligand 11                         | <i>Ccl11</i>   | 20.0                 | < 0.0001 | 1.9                     | 0.0457  |
| Chemokine (C-C motif) ligand 17                         | <i>Ccl17</i>   | 2.2                  | 0.0129   | 3.3                     | 0.0044  |
| Chemokine (C-C motif) receptor 8                        | <i>Ccr8</i>    | 2.8                  | 0.0817   | 1.5                     | 0.4973  |
| CD209 antigen-like protein E                            | <i>Cd209e</i>  | 192.6                | < 0.0001 | 2.1                     | 0.2032  |
| Chitinase, acidic                                       | <i>Chia</i>    | 8.9                  | < 0.0001 | 1.4                     | 0.0335  |
| Calcium-activated chloride channel family member 3      | <i>Clca3</i>   | 566.7                | < 0.0001 | 449.8                   | 0.0009  |
| Eosinophil-associated, ribonuclease A family, member 11 | <i>Ear11</i>   | 262.0                | < 0.0001 | 21.8                    | 0.0042  |
| FXD domain-containing ion transport regulator 4         | <i>Fxyd4</i>   | 114.1                | 0.0004   | 3.0                     | 0.0651  |
| Glycine amidinotransferase                              | <i>Gatm</i>    | 17.1                 | < 0.0001 | 1.6                     | 0.2127  |
| Interleukin 4                                           | <i>Il4</i>     | 24.2                 | 0.0014   | 1.3                     | 0.6631  |
| Interleukin 5                                           | <i>Il5</i>     | 3.3                  | 0.0123   | 1.7                     | 0.4084  |
| Interleukin 13                                          | <i>Il13</i>    | 1.7                  | 0.0949   | 1.2                     | 0.5898  |
| Interleukin 13 receptor, alpha 2                        | <i>Il13ra2</i> | 52.5                 | < 0.0001 | 1.4                     | 0.1674  |
| Integrin alpha X                                        | <i>Itgax</i>   | 4.0                  | 0.0066   | 1.9                     | 0.3151  |
| Matrix metalloproteinase 12                             | <i>Mmp12</i>   | 2.2                  | 0.0084   | 1.5                     | 0.0662  |
| Homeobox, msh-like 3                                    | <i>Msx3</i>    | 185.1                | < 0.0001 | 1.5                     | 0.3426  |
| Periostin, osteoblast specific factor                   | <i>Postn</i>   | 2.4                  | 0.0572   | 1.4                     | 0.4992  |
| Resistin like alpha                                     | <i>Retnla</i>  | 5.2                  | 0.0046   | 6.2                     | 0.0047  |
| Resistin like beta                                      | <i>Retnlb</i>  | 7.8                  | 0.0006   | 2.5                     | 0.0754  |
| Serum amyloid A 1                                       | <i>Saa1</i>    | 8.8                  | 0.0223   | 2.2                     | 0.2086  |
| Serum amyloid A 3                                       | <i>Saa3</i>    | 5.4                  | 0.0338   | 1.3                     | 0.3834  |
| Scinderin                                               | <i>Scin</i>    | 20.8                 | < 0.0001 | 3.3                     | 0.0232  |
| Selectin, platelet                                      | <i>Selp</i>    | 5.4                  | 0.0002   | 1.2                     | 0.0915  |
| Solute carrier family 26, member 4                      | <i>Slc26a4</i> | 19.1                 | 0.0003   | 4.3                     | 0.0014  |
| Secreted phosphoprotein 1                               | <i>Spp1</i>    | 3.8                  | 0.0014   | 1.2                     | 0.0694  |

Mice were sensitized to ragweed pollen extract in alum by the i.p. route and were exposed weekly to low dose (0.5 µg) ragweed administered by the i.n. route for 16 weeks. Mice were then rested for 2 weeks and given a final challenge with a single high dose (5 µg) of RW 24 hours before sacrifice or were not challenged before sacrifice. Control mice were sensitized by i.p. injection with ragweed, but exposed to saline weekly thereafter. Gene expression was analyzed using Mouse WG-6 v2 BeadChips (Illumina). Values represent fold induction in RW-exposed mice in comparison to saline-exposed mice. Significance was evaluated by student's T test.

**Table E2: Selected CpG-ODN-upregulated genes in ragweed (RW) allergic mice treated with 1018 ISS**

| Genes                                                 |                 | With Final Challenge      |          | Without Final Challenge     |          |
|-------------------------------------------------------|-----------------|---------------------------|----------|-----------------------------|----------|
|                                                       |                 | RW+1018 ISS versus Saline |          | RW + 1018 ISS versus Saline |          |
| Common Name                                           | mSymbol         | Fold Induction            | p-value  | Fold Induction              | p-value  |
| Caspase 1                                             | <i>Casp1</i>    | 2.3                       | < 0.0001 | 2.1                         | < 0.0001 |
| Chemokine (C-C motif) ligand 4                        | <i>Ccl4</i>     | 2.9                       | 0.0392   | 7.9                         | < 0.0001 |
| Chemokine (C-C motif) ligand 5                        | <i>Ccl5</i>     | 2.7                       | 0.0001   | 3.3                         | < 0.0001 |
| Chemokine (C-C motif) ligand 19                       | <i>Ccl19</i>    | 14.9                      | < 0.0001 | 36.3                        | < 0.0001 |
| Chemokine (C-C motif) receptor 5                      | <i>Ccr5</i>     | 10.3                      | < 0.0001 | 9.1                         | < 0.0001 |
| CD72 antigen                                          | <i>Cd72</i>     | 5.4                       | 0.0003   | 6.1                         | 0.0018   |
| Chemokine (C-X-C motif) ligand 9                      | <i>Cxcl9</i>    | 226.4                     | < 0.0001 | 102.9                       | 0.0002   |
| Chemokine (C-X-C motif) ligand 10                     | <i>Cxcl10</i>   | 13.5                      | 0.0030   | 10.0                        | 0.0001   |
| Chemokine (C-X-C motif) ligand 13                     | <i>Cxcl13</i>   | 4.9                       | 0.0021   | 5.8                         | 0.0008   |
| Chemokine (C-X-C motif) receptor 3                    | <i>Cxcr3</i>    | 5.8                       | < 0.0001 | 6.6                         | < 0.0001 |
| Guanylate binding protein 1                           | <i>Gbp1</i>     | 2.7                       | 0.0110   | 1.0                         | 0.5198   |
| Glycosylation dependent cell adhesion molecule 1      | <i>Glycam1</i>  | 14.1                      | 0.0035   | 25.9                        | 0.0078   |
| Interferon-alpha 1                                    | <i>Ifna1</i>    | 3.2                       | 0.0314   | 2.8                         | 0.0870   |
| Interferon-gamma                                      | <i>Ifng</i>     | 24.2                      | < 0.0001 | 16.8                        | < 0.0001 |
| Interleukin 2                                         | <i>Il2</i>      | 2.8                       | 0.0549   | 2.5                         | 0.0338   |
| Interferon regulatory factor 1                        | <i>Irf1</i>     | 1.6                       | 0.0463   | 1.2                         | 0.0109   |
| Jun-B oncogene                                        | <i>Junb</i>     | 1.6                       | 0.0025   | 1.1                         | 0.3886   |
| 26S proteasome regulatory subunit p28                 | <i>Psmc10</i>   | 1.2                       | 0.0123   | 1.2                         | 0.0026   |
| Pentraxin related gene                                | <i>Ptx3</i>     | 1.8                       | 0.0531   | 1.6                         | 0.1309   |
| Src-like-adaptor 2                                    | <i>Sla2</i>     | 6.3                       | 0.0050   | 10.8                        | 0.0002   |
| Signal transducer and activator of transcription 1    | <i>Stat1</i>    | 2.5                       | 0.0109   | 1.5                         | 0.0011   |
| Signal transducer and activator of transcription 4    | <i>Stat4</i>    | 1.6                       | 0.0019   | 1.7                         | 0.0006   |
| Tumor necrosis factor                                 | <i>Tnf</i>      | 2.8                       | 0.0305   | 6.3                         | < 0.0001 |
| Tumor necrosis factor receptor superfamily, member 1b | <i>Tnfrsf1b</i> | 1.9                       | 0.0003   | 2.4                         | < 0.0001 |

Mice were sensitized to ragweed pollen extract in alum by the i.p. route and were exposed weekly to low dose (0.5 µg) ragweed and 1018 ISS (20 µg) administered by the i.n. route for 16 weeks. Mice were rested for 2 weeks and given a final challenge with a single high dose (5 µg) of RW 24 hours before sacrifice or were not challenged before sacrifice. Control mice were sensitized by i.p. injection with ragweed, but exposed to saline weekly thereafter. Gene expression was analyzed using Mouse WG-6 v2 BeadChips (Illumina). Values represent fold induction in RW+1018 ISS-exposed mice in comparison to saline-exposed mice. Significance was evaluated by student's T test.
